# Supplementary material
Source: PubMed Central journal article supplement (PMC6646230)
Supplement: ao8b02085_si_001.pdf [file ao8b02085_si_001.pdf]

## Supporting Information

### **Nitrogen-Doped Graphene Quantum Dots Combined *Sodium 10-Amino-2-Methoxyundecanoate*: Studies of Pro-Inflammatory Gene Expression and Live Cell Imaging**

Rai Sameer Kumar <sup>1</sup>, Ganeshan Shakambari<sup>1</sup>, Balasubramaniam Ashokkumar<sup>2</sup>, D. James Nelson<sup>3</sup>, S. Abraham John<sup>3±</sup> and Perumal Varalakshmi<sup>1\*</sup>

<sup>1</sup>*Department of Molecular Microbiology, School of Biotechnology, Madurai Kamaraj University, Madurai, Tamil Nadu, India 625 021.*

<sup>2</sup>*Department of Genetic Engineering, School of Biotechnology, Madurai Kamaraj University, Madurai, Tamil Nadu, India 625 021.*

<sup>3</sup>*Department of Chemistry, The Gandhigram Rural Institute, Gandhigram, Dindigul, Tamil Nadu, India 624 302.*

\* *Corresponding author*<sup>1</sup>. Tel: +91 944 2061877, Fax: +91 452245 9105,

*E-mail: [pylakshmi.biotech@mkuniversity.org](mailto:pylakshmi.biotech@mkuniversity.org)*

± *Corresponding author*<sup>2</sup>. Tel: 91-451-2452371-76 email: [s.abrahamjohn@ruraluniv.ac.in](mailto:s.abrahamjohn@ruraluniv.ac.in)

|                                                                                                          |           |
|----------------------------------------------------------------------------------------------------------|-----------|
| Figure S1 HPLC and FT-IR analysis of the compound.....                                                   | S-3       |
| Figure S2 <sup>1</sup> H NMR and <sup>13</sup> C NMR of the purified <b>SAM</b> .....                    | S-3 & S-4 |
| Figure S3 2D-NMR analysis of the <b>SAM</b> .....                                                        | S-4       |
| Figure S4 ESI MS analysis of the <b>SAM</b> .....                                                        | S-5       |
| Figure S5 Structural analysis of <i>Sodium 10-amino-2-methoxyundecanoate (SAM)</i> .....                 | S-5       |
| Figure S6 Absorption spectra and emission spectrum.....                                                  | S-6       |
| Figure S7 Cell survival assay of <b>SAM</b> on RAW 264.7 macrophage.....                                 | S-7       |
| Figure S8 Binding constant plot for fluorescence quenching of N-GQDs in the presence of <b>SAM</b> ..... | S-7       |
| Table S1 Structural validation of <b>SAM</b> by NMR analysis.....                                        | S-8       |
| Table S2 List of primers used for RT-PCR analysis.....                                                   | S-8 & S-9 |

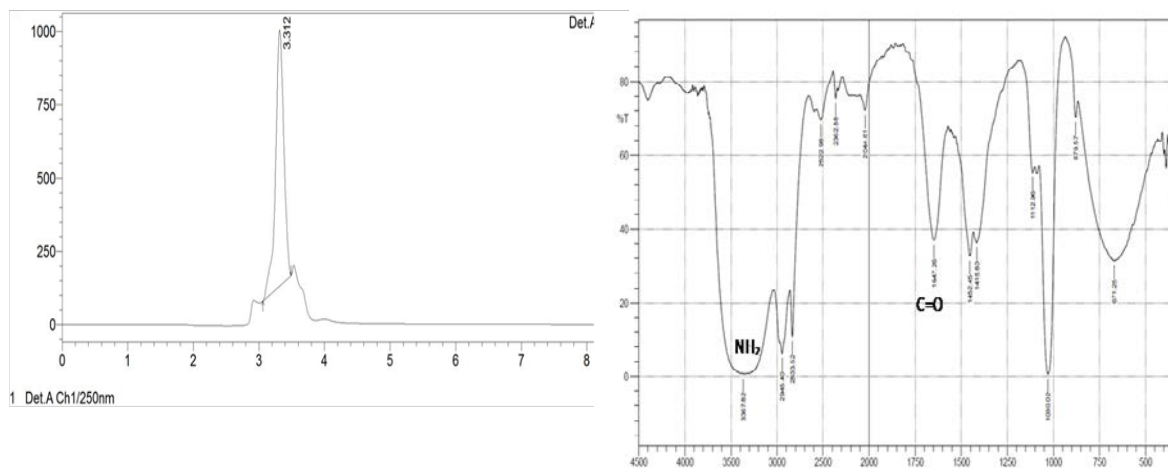

**Figure S1.** HPLC and FT-IR spectrum of SAM fraction from *Lyngbya* sp.,

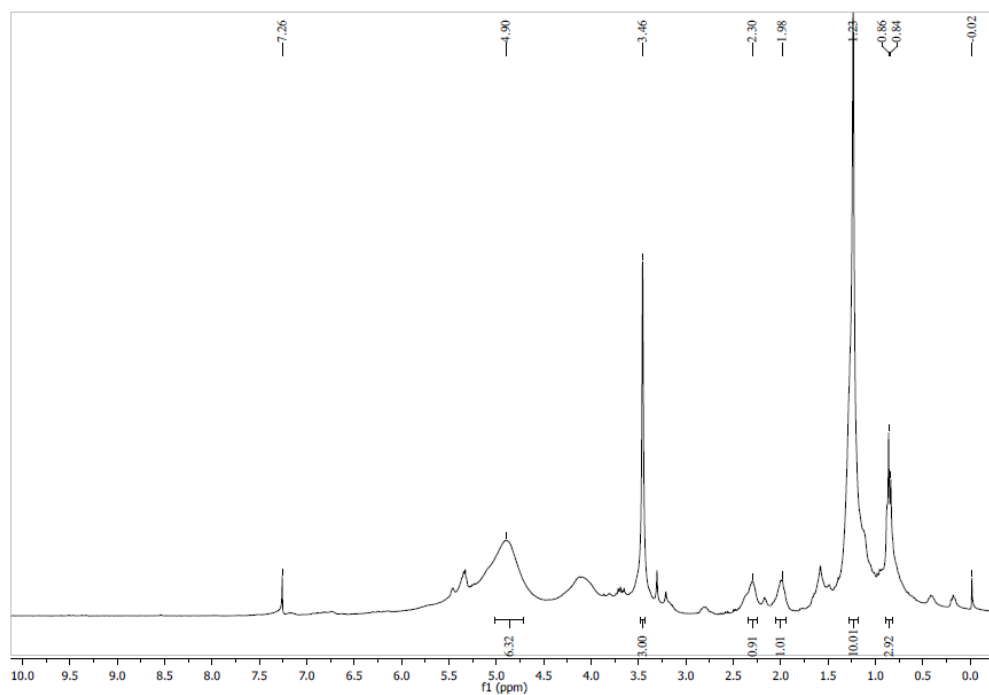

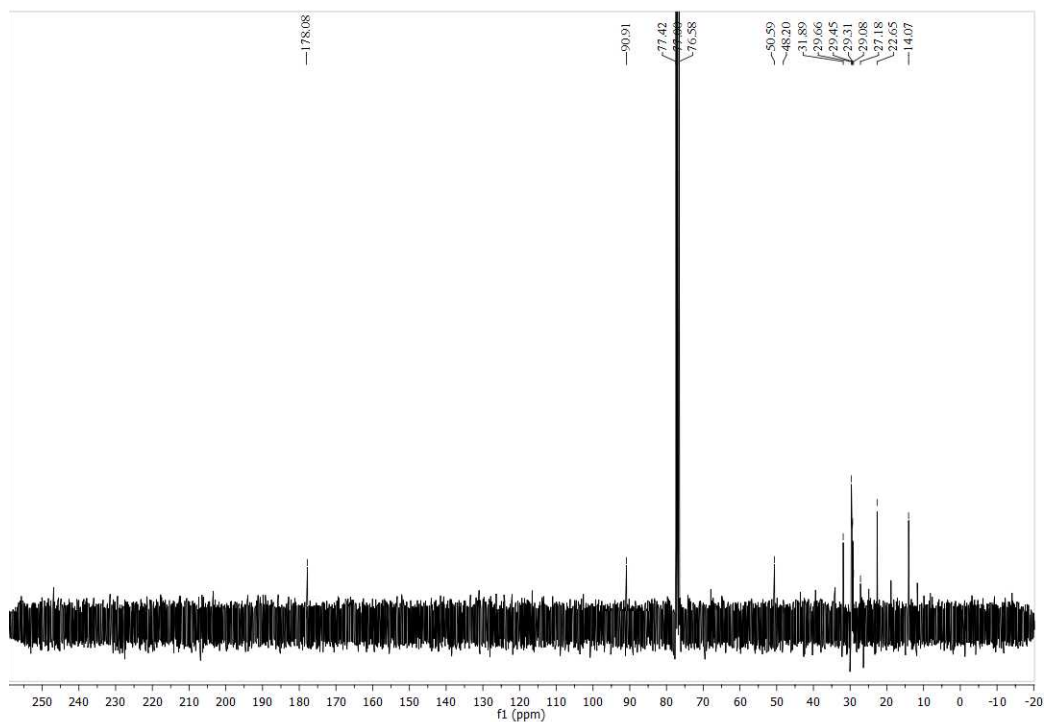

Figure S2. <sup>1</sup>H NMR & <sup>13</sup>C NMR of SAM from *Lyngbya* sp.

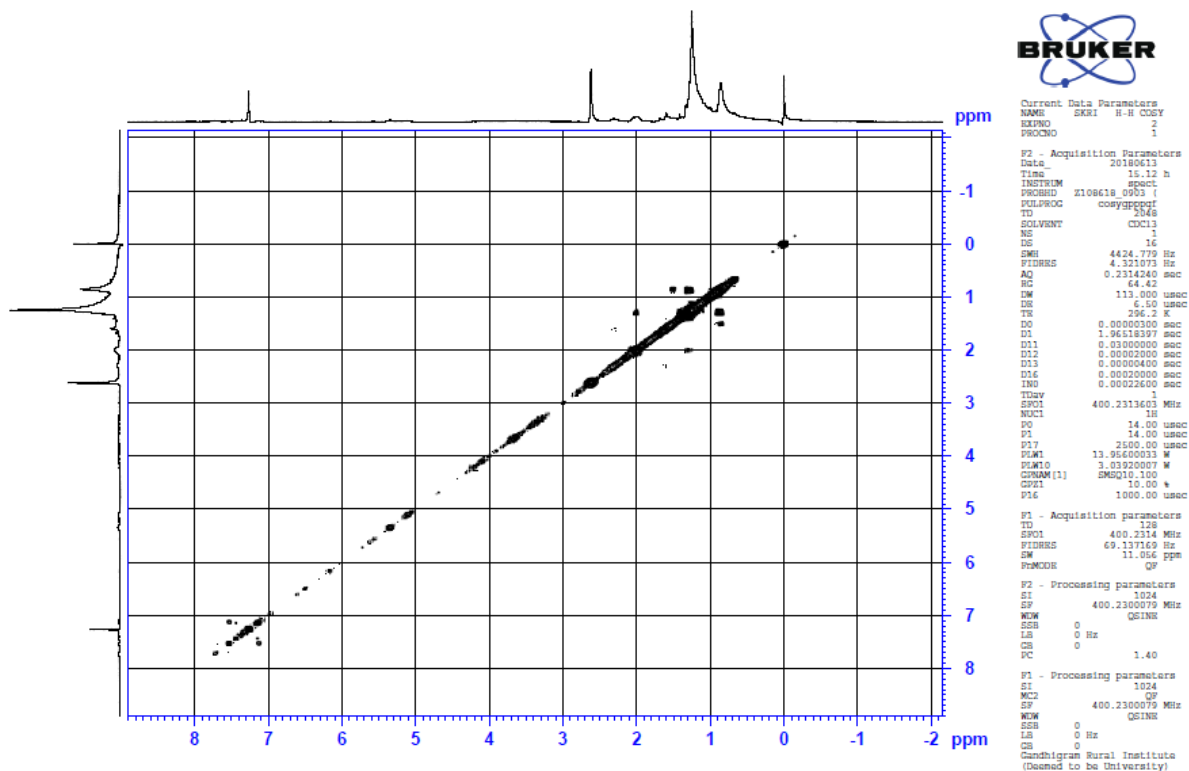

Figure S3. 2D-NMR of SAM from *Lyngbya* sp.

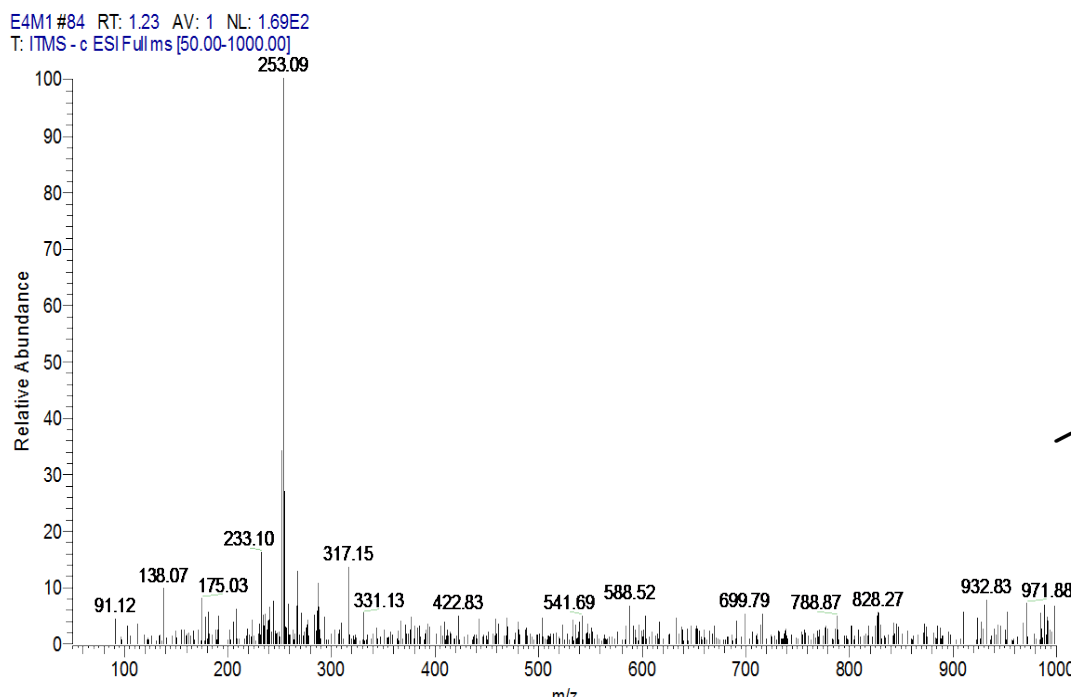

**Figure S4.** ESI-MS of SAM from *Lyngbya* sp. major peak observed is of mass 253.09.

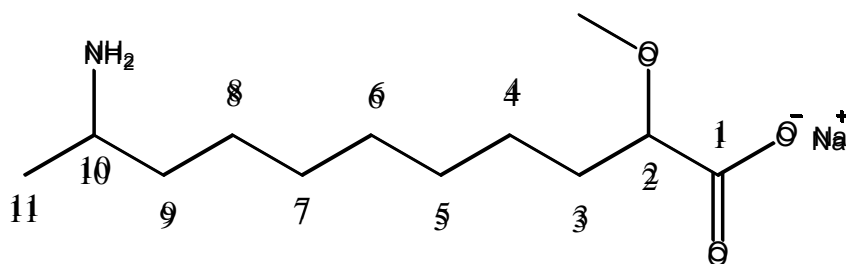

**Figure S5.** Structural of *Sodium 10-amino-2-methoxyundecanoate (SAM)*.

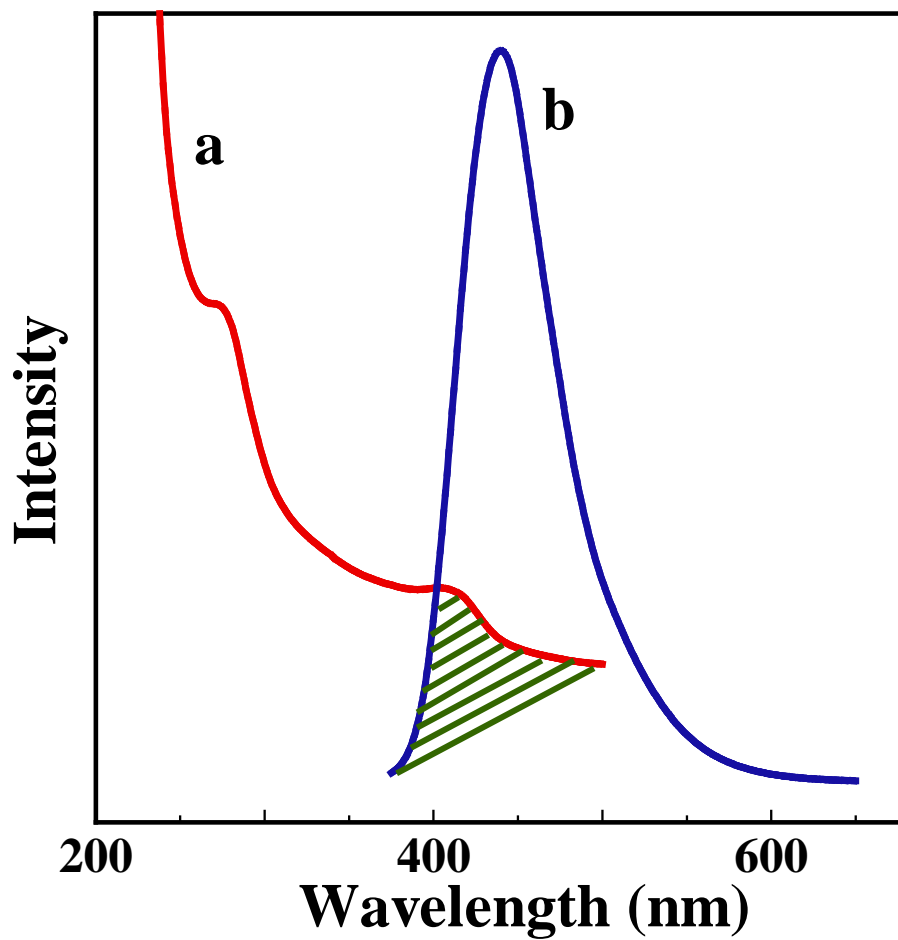

**Figure S6.** Spectral overlap of absorption spectrum of (a) SAM with emission spectrum of N-GQDs (b).

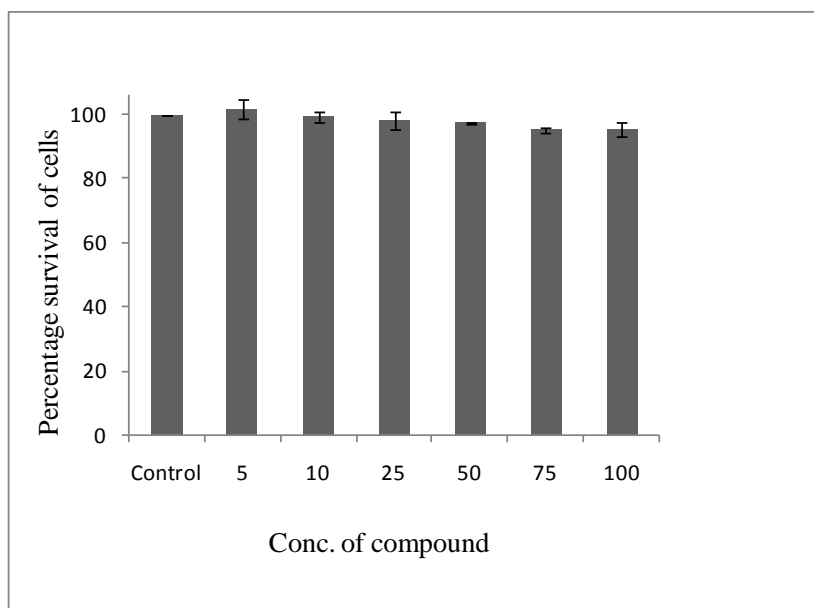

**Figure S7.** Effect of compound **SAM** on survival percentage of RAW 264.7 cells.

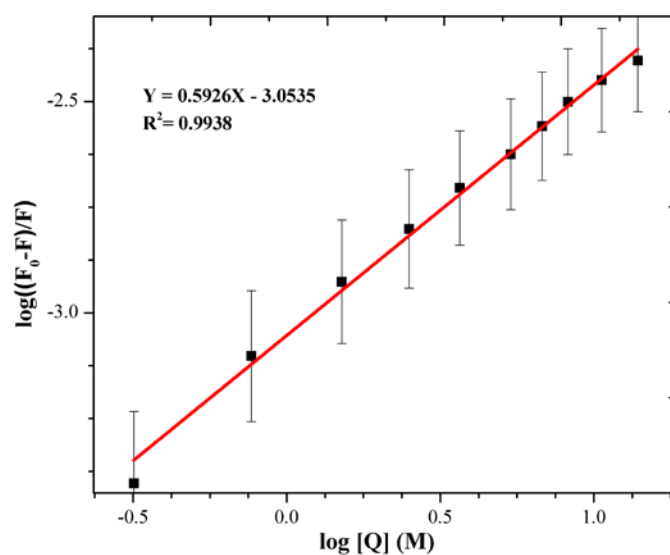

**Figure S8.** Binding constant plot for fluorescence quenching of N-GQDs in the presence of SAM.

**Table S1.** Structural validation of SAM by NMR.

| $\delta$ (ppm) | No., of H corresponding | Attachment/position of H in the molecule           |
|----------------|-------------------------|----------------------------------------------------|
| 0.85, 0.87     | 3                       | CH <sub>3</sub> (C <sub>11</sub> )                 |
| 1.12           | 2                       | CH <sub>2</sub> (C <sub>3</sub> )                  |
| 1.25           | 10                      | CH <sub>2</sub> (C <sub>4</sub> – C <sub>8</sub> ) |
| 1.59           | 2                       | CH <sub>2</sub> (C <sub>9</sub> )                  |
| 1.99           | 1                       | CH (C <sub>2</sub> )                               |
| 2.31           | 1                       | CH (C <sub>10</sub> )                              |
| 3.47           | 3                       | OCH <sub>3</sub> (C <sub>2</sub> )                 |
| 4.13           | 2                       | NH <sub>2</sub>                                    |

**Table S2.** List of primers used for RT-PCR analysis for the expression of the inflammatory genes:

| Gene symbol                    | Gene Name           | Forward Primer                | Reverse Primer                |
|--------------------------------|---------------------|-------------------------------|-------------------------------|
| <i>Act</i>                     | Actin               | CTGACAGACTACCTCATGAG<br>ATCC  | CTCGAAGTCTAGAGCAACAT<br>AGCAC |
| <i>IL-1<math>\alpha</math></i> | Interleukin-1 alpha | ATCAGCACCTTACACCTACC<br>AGAGT | GCTGAGATAGTGTGGTCCACATC       |
| <i>IL-1<math>\beta</math></i>  | Interleukin-1 beta  | GTTCCATTAGACAACCTGCA<br>CTAC  | CTTGGTTCTCCTTGTACAAA<br>GCTC  |
| <i>IL-4</i>                    | Interleukin-4       | CTTCTTTCTCGAATGTACCA<br>GGAG  | GAGCTCACTCTCTGTGGTGT<br>TCT   |
| <i>IL-6</i>                    | Interleukin-        | CCAGAGTCCTTCAGAGAGAT          | CTGTGACTCCAGCTTATCTG          |



|                                    |                                 |                               |                               |
|------------------------------------|---------------------------------|-------------------------------|-------------------------------|
|                                    | 6                               | ACAGA                         | TTAGG                         |
| <i>COX-2</i>                       | Cyclooxygenase-2                | GACCGAGTTTACTGAGAAAG<br>AGGAG | CTCCTGGAAGGTACCAAAG<br>ATAGAG |
| <i>TNF-<math>\alpha</math></i>     | Tumor necrosis factor           | GATGGGTTGTACCTTGTCTA<br>CTCC  | GAGGTTGACTTTCTCCTGGT<br>ATGAG |
| <i>NF-<math>\kappa\beta</math></i> | Nuclear factor-kappa beta       | AGTACCACCTATGATGGGAC<br>TACAC | GTCATAGAGAGGCTCAAAG<br>TTCTCC |
| <i>iNOS</i>                        | Inducible nitric oxide synthase | CCTCCTCCACCCTACCAAGT          | CACCCAAAGTGCTTCAGTCA          |
